# Supplementary material
Source: Springer Nature journal article supplement (https://www.springermedizin.de/resource/supplementary/12876_2013_1061_MOESM2_ESM.pdf/9438372)

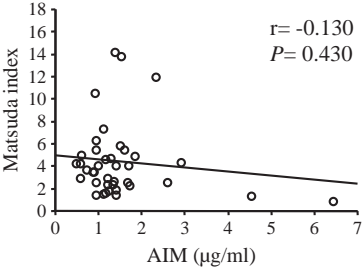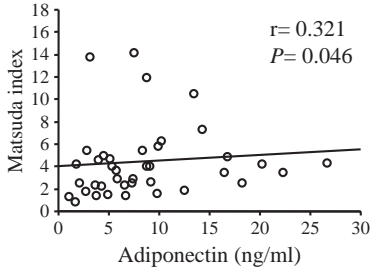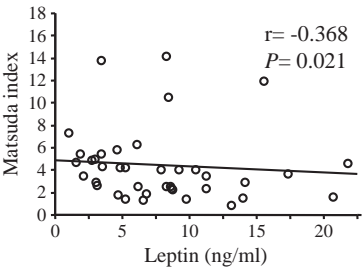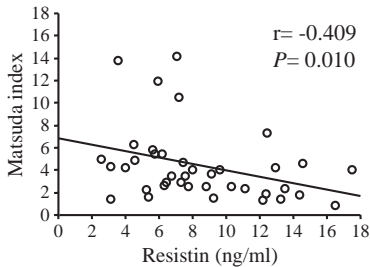

Supplement: MOESM2 [file 9438372]
